# Supplementary material for: Impact of Dietary Manganese on Intestinal Barrier and Inflammatory Response in Broilers Challenged with Salmonella Typhimurium
Source: PubMed Central journal article supplement (PMC7285304; doi:10.3390/microorganisms8050757), 2020-05-18
Supplement: microorganisms-08-00757-s001.pdf [file microorganisms-08-00757-s001.pdf]

**Table S1.** Composition and nutrient levels in the basal diets (dry matter basis)

| <b>Ingredients</b>          | <b>g/kg diet</b> | <b>Nutrient analysis</b>       | <b>g/kg diet</b> |
|-----------------------------|------------------|--------------------------------|------------------|
| Ground corn                 | 543.0            | AME/(kcal/kg)                  | 2950             |
| Soybean oil                 | 34.0             | CP                             | 210              |
| Soybean meal (44%)          | 380.2            | Calcium                        | 10.1             |
| Lysine (98%)                | 1.5              | Available Phosphorus           | 4.5              |
| DL-Methionine               | 2.5              | Lysine                         | 11.5             |
| Calcium carbonate           | 11.4             | Methionine                     | 5.0              |
| Di-calcium Phosphate        | 18.6             | Methionine and Cystine         | 8.6              |
| Sodium chloride             | 4.0              | Manganese (mg/kg) <sup>3</sup> | 25.62            |
| Choline chloride            | 1.5              |                                |                  |
| Vitamin premix <sup>1</sup> | 0.3              |                                |                  |
| Mineral premix <sup>2</sup> | 3.0              |                                |                  |
| <b>Total</b>                | <b>1000</b>      |                                |                  |

<sup>1</sup> Provided per kilogram of diet: Vitamin A 8000 IU; Vitamin D<sub>3</sub> 1000 IU; Vitamin E 20 IU; Vitamin K<sub>3</sub> 0.5 mg; Pantothenic acid 10 mg; Niacin amide 35 mg; Folic acid 0.55 mg; Biotin 0.18 mg.

<sup>2</sup> Provided per kilogram of diet: Cu (CuSO<sub>4</sub>·5H<sub>2</sub>O), 8 mg; Fe (FeSO<sub>4</sub>·7H<sub>2</sub>O), 80 mg; Zn (ZnSO<sub>4</sub>·7H<sub>2</sub>O), 70; Se (NaSeO<sub>3</sub>), 0.3 mg; I (KI), 0.7 mg.

<sup>3</sup>Manganese concentration in the basal diet was analyzed by atomic absorption spectrophotometer.

AME, apparent metabolism energy; CP, crude protein;

**Table S2.** The primers for quantitative real-time PCR

| Gene                            | Gene ID        | Primer  | Sequence (5'-3')       | Product Size (bp) |
|---------------------------------|----------------|---------|------------------------|-------------------|
| <i>IL-1<math>\beta</math></i>   | NM_204524.1    | Reverse | gcatcaagggctacaagctc   | 131               |
|                                 |                | Forward | caggcggtagaagatgaagc   |                   |
| <i>IL-6</i>                     | NM_204628.1    | Reverse | ctcctcgcaatctgaagtc    | 100               |
|                                 |                | Forward | ccctcacggctcttccata    |                   |
| <i>IL-8</i>                     | AJ009800       | Reverse | gcttgctaggggaaatgaag   | 136               |
|                                 |                | Forward | ggaattaccagtttgctgctg  |                   |
| <i>IL-12<math>\beta</math></i>  | NM_213571.1    | Reverse | cctgctgtctgctaagacc    | 82                |
|                                 |                | Forward | atcatttgccttggagtc     |                   |
| <i>IL-18</i>                    | NM_204608.1    | Reverse | tgaaatctggcagtggaatg   | 144               |
|                                 |                | Forward | caaccatttcccatgctct    |                   |
| <i>IFN-<math>\gamma</math></i>  | NM_205149.1    | Reverse | cagatgtagctgacggtgga   | 98                |
|                                 |                | Forward | catcgaacaatctggctca    |                   |
| <i>TNF-<math>\alpha</math></i>  | GU230788.1     | Reverse | gccttctctgaaccagatg    | 71                |
|                                 |                | Forward | acacgacagccaagtcaacg   |                   |
| <i>TRAF6</i>                    | XM_015287208.1 | Reverse | atggaagccaagccagagtt   | 144               |
|                                 |                | Forward | acagcgcaccagaagggtat   |                   |
| <i>NF-<math>\kappa</math>B</i>  | M86930.1       | Reverse | tcaacgcaggacctaaagacat | 162               |
|                                 |                | Forward | gcagatagccaagttcaggatg |                   |
| <i>MnSOD</i>                    | NM_204211.1    | Reverse | ttctgacctgcttacgactat  | 138               |
|                                 |                | Forward | ccagcgctcttgtatttct    |                   |
| <i>claudin-1</i>                | NM_001013611.2 | Reverse | gtctttgggtggcgtgatctt  | 117               |
|                                 |                | Forward | tctggtgtaacgggtgtga    |                   |
| <i>ZO-1</i>                     | XM_015278981.2 | Reverse | ggtcagccagatgtggattt   | 81                |
|                                 |                | Forward | ccgaagcattccatcttcat   |                   |
| <i>Occludin</i>                 | NM_205128.1    | Reverse | gctgagatggacagcatcaa   | 97                |
|                                 |                | Forward | cctctgccacatctggat     |                   |
| <i><math>\beta</math>-actin</i> | NM_205518.1    | Reverse | gctacagctcaccaccaca    | 90                |
|                                 |                | Forward | tctctgctcgaatccagt     |                   |
| <i>GAPDH</i>                    | NM_204305.1    | Reverse | tggaagcttactggaatgg    | 88                |
|                                 |                | Forward | cttgctggttctccagac     |                   |

*IL*, interleukin; *IFN*, interferon; *TNF*, tumor necrosis factor. *TRAF6*, TNF receptor-associated factor 6. *NF- $\kappa$ B*, nuclear transcription factor kappa B; *MnSOD*, manganese superoxide dismutase; *ZO-1*, zona occludens 1; *GAPDH*, glyceraldehyde-3-phosphate dehydrogenase.

1 **Table S3.** Sequences of the primers used for the determination of the microbial population

| <b>Items</b>            | <b>Primer</b> | <b>Sequence (5'-3')</b>   |
|-------------------------|---------------|---------------------------|
| Total bacteria          | Reverse       | gatccgcttgcttcgca         |
|                         | Forward       | catccagtgcaaacctaaagag    |
| <i>Lactobacillus</i>    | Reverse       | gatccgcttgcttcgca         |
|                         | Forward       | catccagtgcaaacctaaagag    |
| <i>Bifidobacterium</i>  | Reverse       | taagccatggactttcacacc     |
|                         | Forward       | gggtggtaatgccgatg         |
| <i>Enterococcus</i>     | Reverse       | act cgttgtacttcccattgt    |
|                         | Forward       | cccttattgtagttgccatcatt   |
| <i>Salmonella</i>       | Reverse       | aaacggtgaaaaactgagga      |
|                         | Forward       | tcgtcattccattacctacc      |
| <i>Escherichia coli</i> | Reverse       | agaacgctttgtggtaaatcagga  |
|                         | Forward       | gtgtgatctaccgcttcgc       |
| <i>Clostridium</i>      | Reverse       | cccttacaccagtaa           |
|                         | Forward       | gagttgatcmtggctcag        |
| <i>Enterobacter</i>     | Reverse       | ctctacgagactcaagcttgc     |
|                         | Forward       | cattgacgttaccgcag aagaagc |

3 **Table S4.** Effects of graded Mn on *MnSOD* and inflammatory cytokine expressions in spleen,  
 4 thymus, and bursa of broilers following oral *S. Typhimurium*

| Gene         | Tissue | Dietary Mn levels           |                            |                             |
|--------------|--------|-----------------------------|----------------------------|-----------------------------|
|              |        | Deficient diet<br>(0 mg/kg) | Control diet<br>(40 mg/kg) | Surfeit diet (100<br>mg/kg) |
| <i>TNF-α</i> | Spleen | 1.03±0.06 <sup>b</sup>      | 1.33±0.06 <sup>a</sup>     | 1.33±0.01 <sup>a</sup>      |
| <i>IFN-γ</i> | Spleen | 0.91±0.17 <sup>b</sup>      | 1.48±0.18 <sup>a</sup>     | 1.51±0.20 <sup>a</sup>      |
| <i>IL-8</i>  | Spleen | 0.84±0.14 <sup>b</sup>      | 1.24±0.20 <sup>a</sup>     | 1.53±0.04 <sup>a</sup>      |
| <i>IL-18</i> | Spleen | 1.32±0.07                   | 1.43±0.10                  | 1.54±0.32                   |
| <i>IL-1β</i> | Spleen | 1.03±0.24 <sup>c</sup>      | 1.78±0.33 <sup>b</sup>     | 2.16±0.14 <sup>a</sup>      |
| <i>IL-10</i> | Spleen | 1.07±0.20                   | 1.11±0.17                  | 1.09±0.29                   |
| <i>IL-12</i> | Spleen | 1.19±0.11 <sup>b</sup>      | 2.72±0.56 <sup>a</sup>     | 2.38±0.62 <sup>a</sup>      |
| <i>IL-6</i>  | Spleen | 1.12±0.25                   | 1.87±0.59                  | 2.03±0.90                   |
| <i>IL-4</i>  | Spleen | 1.05±0.48 <sup>a</sup>      | 0.91±0.25 <sup>ab</sup>    | 0.60±0.18 <sup>b</sup>      |
| <i>MnSOD</i> | Spleen | 1.15±0.03 <sup>b</sup>      | 1.61±0.11 <sup>a</sup>     | 1.69±0.14 <sup>a</sup>      |
| <i>TRAF6</i> | Spleen | 1.15±0.14 <sup>b</sup>      | 1.30±0.08 <sup>ab</sup>    | 1.37±0.16 <sup>a</sup>      |
| <i>NF-κB</i> | Spleen | 1.07±0.13 <sup>b</sup>      | 1.53±0.18 <sup>a</sup>     | 1.69±0.17 <sup>a</sup>      |
| <i>IL-1β</i> | Thymus | 0.97±0.03                   | 0.98±0.08                  | 1.05±0.14                   |
| <i>IL-8</i>  | Thymus | 1.04±0.03 <sup>b</sup>      | 1.33±0.25 <sup>a</sup>     | 0.92±0.08 <sup>b</sup>      |
| <i>IL-6</i>  | Thymus | 1.52±0.04                   | 1.55±0.14                  | 1.48±0.09                   |
| <i>TNF-α</i> | Thymus | 0.89±0.04                   | 0.91±0.04                  | 0.98±0.04                   |
| <i>IL-18</i> | Thymus | 1.41±0.09                   | 1.55±0.20                  | 1.62±0.09                   |
| <i>IFN-γ</i> | Thymus | 0.85±0.09                   | 1.18±0.13                  | 1.07±0.08                   |
| <i>IL-12</i> | Thymus | 1.03±0.05 <sup>b</sup>      | 1.73±0.26 <sup>a</sup>     | 1.68±0.44 <sup>a</sup>      |
| <i>IL-4</i>  | Thymus | 1.20±0.38                   | 1.44±0.73                  | 1.57±0.36                   |
| <i>IL-10</i> | Thymus | 0.87±0.06                   | 0.63±0.03                  | 0.91±0.10                   |
| <i>MnSOD</i> | Thymus | 1.37±0.12                   | 1.44±0.20                  | 1.48±0.18                   |
| <i>TRAF6</i> | Thymus | 1.39±0.20                   | 1.54±0.14                  | 1.63±0.21                   |
| <i>NF-κB</i> | Thymus | 1.19±0.13                   | 1.27±0.11                  | 1.22±0.08                   |
| <i>IL-1β</i> | Bursa  | 1.04±0.22                   | 0.97±0.15                  | 1.09±0.06                   |
| <i>IFN-γ</i> | Bursa  | 1.08±0.30                   | 0.91±0.25                  | 1.17±0.21                   |
| <i>TNF-α</i> | Bursa  | 1.18±0.06                   | 1.11±0.04                  | 1.18±0.05                   |
| <i>IL-8</i>  | Bursa  | 1.33±1.73                   | 1.28±1.01                  | 1.34±0.65                   |
| <i>IL-18</i> | Bursa  | 1.12±0.30                   | 1.33±0.17                  | 1.45±0.04                   |
| <i>IL-12</i> | Bursa  | 1.16±4.11                   | 1.33±3.12                  | 1.38±0.31                   |
| <i>IL-6</i>  | Bursa  | 1.01±0.62 <sup>b</sup>      | 1.43±1.09 <sup>a</sup>     | 1.39±0.35 <sup>ab</sup>     |
| <i>IL-10</i> | Bursa  | 1.04±0.46                   | 1.11±0.29                  | 0.98±0.19                   |
| <i>MnSOD</i> | Bursa  | 1.17±0.08                   | 1.22±0.10                  | 1.23±0.09                   |
| <i>TRAF6</i> | Bursa  | 1.26±0.06                   | 1.32±0.08                  | 1.37±0.10                   |
| <i>NF-κB</i> | Bursa  | 1.31±0.14                   | 1.34±0.05                  | 1.47±0.11                   |

5 Data represent means with standard deviation. <sup>a, b</sup> Mean values with different letters are  
 6 significantly different (one-way ANOVA,  $P < 0.05$ , Tukey's *post hoc* test).

7 *IL*, interleukin; *IFN*, interferon; *TNF*, tumor necrosis factor. *TRAF6*, TNF receptor-associated  
 8 factor 6. *NF-κB*, nuclear transcription factor kappa B; *MnSOD*, manganese superoxide  
 9 dismutase; *GAPDH*, glyceraldehyde-3-phosphate dehydrogenase.

## Thymus

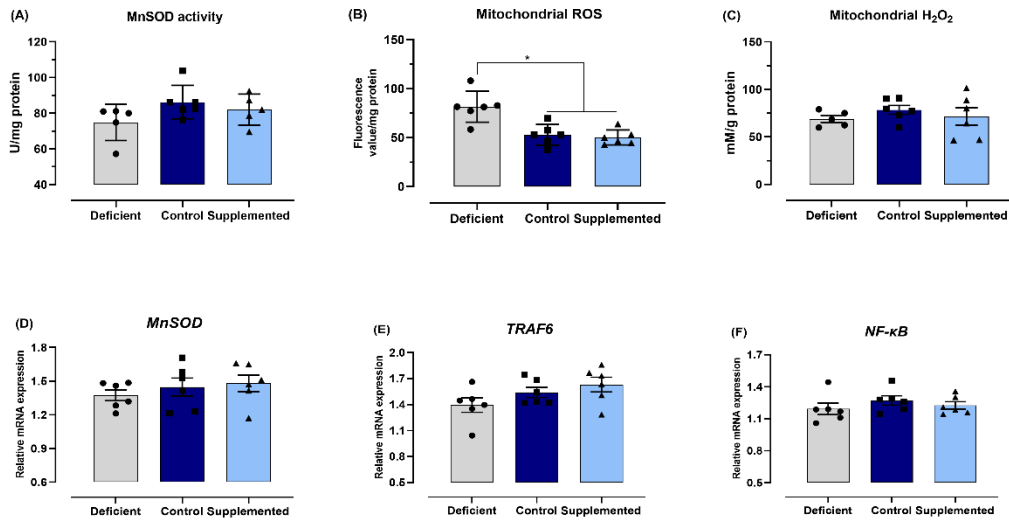

## Bursa

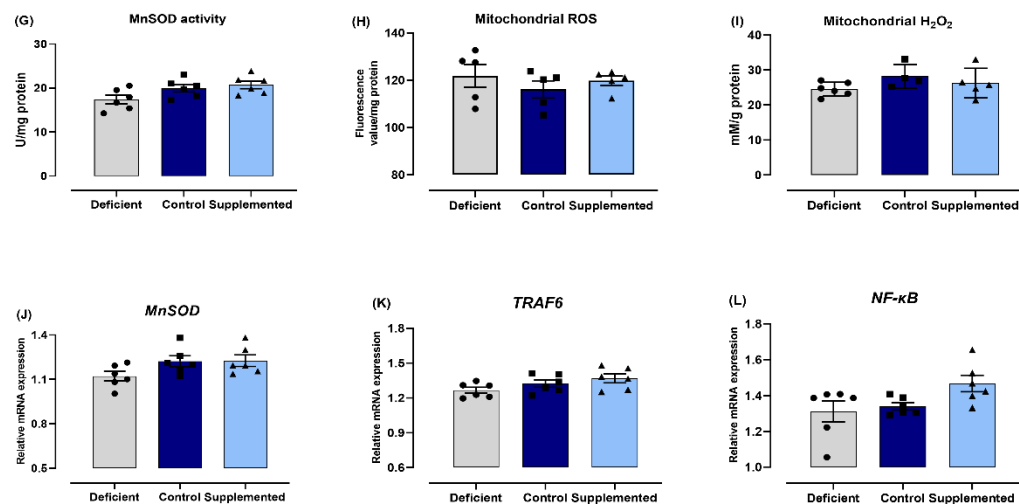

10

11 **Figure S1** Effect of dietary Mn alterations on the activation of redox-sensitive signaling and  
 12 downstream transcription factors in thymus and bursa of birds challenged with *S.*  
 13 *Typhimurium*. (A) and (G) Manganese superoxide dismutase (MnSOD) activity, (B) and (H)  
 14 reactive oxygen species (ROS) level, and (C) and (I) hydrogen peroxide (H<sub>2</sub>O<sub>2</sub>) concentration  
 15 were determined in mitochondria isolated from thymus or bursa, respectively. Meanwhile,  
 16 mRNA expression of (D) *MnSOD*, (E) tumor necrosis factor receptor-associated factor 6  
 17 (*TRAF6*), and (F) nuclear factor kappa-B (*NF- $\kappa$ B*) in thymus or bursa were measured by RT-  
 18 PCR, respectively. Data represent means with standard deviation.  $*P < 0.05$ .
